# Supplementary material for: Promoting water photooxidation on transparent WO3 thin films using an alumina overlayer
Source: Royal Society of Chemistry journal article supplement (doi:10.1039/c3ee42151a), 2013-01-01
Supplement: c3ee42151a.pdf [file c3ee42151a.pdf]

Supplementary Material (ESI) for Energy & Environmental Science  
This journal is © The Royal Society of Chemistry 2010

## Supplementary Material

### **Promoting water photooxidation on transparent WO<sub>3</sub> thin films by an alumina overlayer**

Wooyul Kim,<sup>a</sup> Takashi Tachikawa,<sup>b</sup> Damián Monllor-Satoca,<sup>a</sup> Hyoung-il Kim,<sup>a</sup> Tetsuro  
Majima,<sup>b</sup> and Wonyong Choi<sup>a\*</sup>

<sup>a</sup>*School of Environmental Science and Engineering, Pohang University of Science and Technology (POSTECH),  
Pohang 790-784, Korea*

<sup>b</sup>*The Institute of Scientific and Industrial Research (SANKEN), Osaka University, Mihogaoka 8-1, Ibaraki,  
Osaka 567-0047, Japan.*

1. Fig. S1-S5
2. Tables S1-S2

Supplementary Material (ESI) for Energy & Environmental Science  
This journal is © The Royal Society of Chemistry 2010

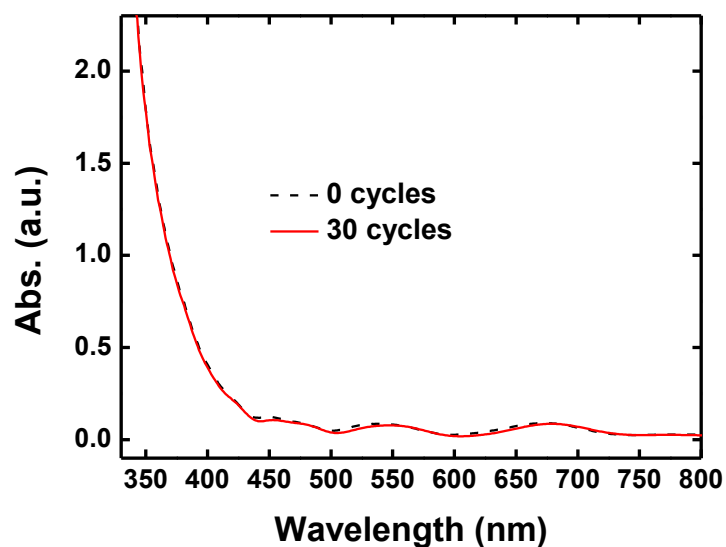

**Fig. S1.** Absorption spectra of transparent WO<sub>3</sub> and Al<sub>2</sub>O<sub>3</sub>/WO<sub>3</sub>. The alumina overlayer was deposited by atomic layer deposition (ALD), for 0 cycles (black) or 30 cycles (red). At wavelengths larger than 440 nm, a typical interference pattern stemming from transparent thin film is observed.

Supplementary Material (ESI) for Energy & Environmental Science  
This journal is © The Royal Society of Chemistry 2010

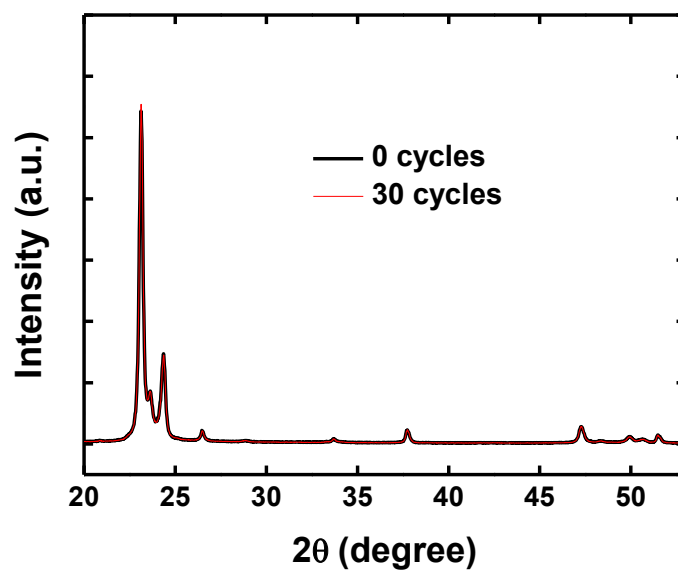

**Fig. S2.** XRD patterns of transparent  $\text{WO}_3$  and  $\text{Al}_2\text{O}_3/\text{WO}_3$ . The alumina overlayer was deposited by atomic layer deposition (ALD), for 0 cycles (black) or 30 cycles (red).

Supplementary Material (ESI) for Energy & Environmental Science  
This journal is © The Royal Society of Chemistry 2010

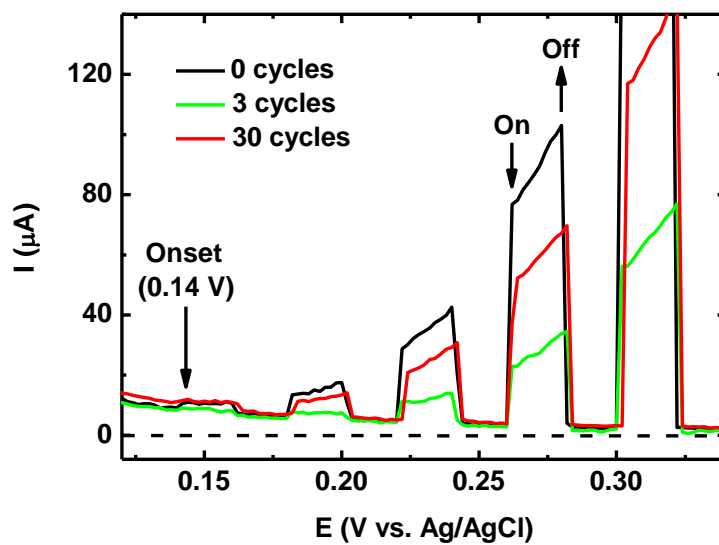

**Fig. S3.** Linear sweep voltammetry of transparent  $\text{Al}_2\text{O}_3/\text{WO}_3$  electrodes, under chopped simulated AM 1.5G illumination. The alumina overlayer was deposited by atomic layer deposition (ALD), for 0 cycles (black), 3 cycles (green) or 30 cycles (red). Electrolyte: Ar-purged 0.1 M  $\text{HClO}_4$ . Scan rate: 2 mV/s.

Supplementary Material (ESI) for Energy & Environmental Science  
This journal is © The Royal Society of Chemistry 2010

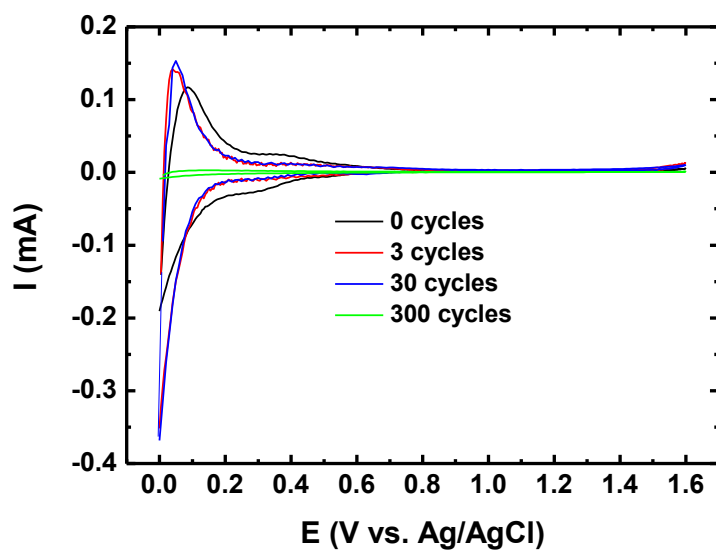

**Fig. S4.** Cyclic voltammetry of transparent  $\text{Al}_2\text{O}_3/\text{WO}_3$  electrodes in the dark. The alumina overlayer was deposited by repeating the cycles of atomic layer deposition (ALD): 0 cycles (black), 3 cycles (red), 30 cycles (blue) or 300 cycles (green). Electrolyte: Ar-purged 0.1 M  $\text{HClO}_4$ . Scan rate: 20 mV/s.

Supplementary Material (ESI) for Energy & Environmental Science  
This journal is © The Royal Society of Chemistry 2010

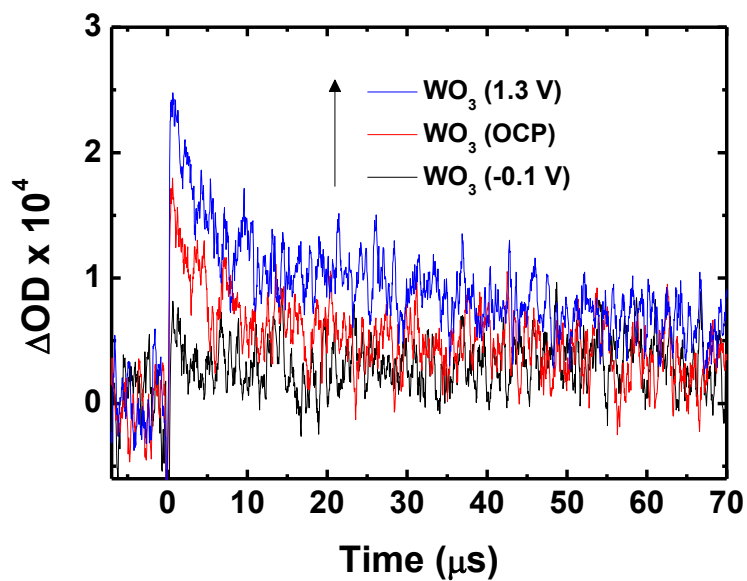

**Fig. S5.** Time traces observed at 480 nm during the 355-nm laser photolysis ( $250 \mu J \text{ pulse}^{-1}$ ) of  $WO_3$  in Ar-purged 0.1 M  $HClO_4$  solution in the absence (open-circuit, OC) and presence of an applied bias (+1.3 V and -0.1 V vs. Ag/AgCl).

Supplementary Material (ESI) for Energy & Environmental Science  
This journal is © The Royal Society of Chemistry 2010

**Table S1.** Integrated photogenerated charge ( $Q_{ph}$ ), evolved oxygen, and calculated faradaic efficiencies ( $\eta$ ) obtained with  $WO_3$  and  $Al_2O_3/WO_3$  (30 ALD cycles) thin films.

| Electrode      | $Q_{ph}$ (C) | $O_2$ ( $\mu$ mol) | $\eta$ (%) |
|----------------|--------------|--------------------|------------|
| $WO_3$         | 6.245        | 2.868              | 17.7       |
| $Al_2O_3/WO_3$ | 8.507        | 11.943             | 54.1       |

**Table S2.** Main parameters obtained upon fitting the deconvoluted TAS spectra (Fig. 7) with Gaussian functions. Peak positions ( $\lambda$ ) and areas (A) are shown.

| Electrode      | Trapped holes  |                    | Trapped electrons |                     |
|----------------|----------------|--------------------|-------------------|---------------------|
|                | $\lambda$ (nm) | A (au $\times$ nm) | $\lambda$ (nm)    | A (au $\times$ nm)  |
| $WO_3$         | $455 \pm 54$   | $0.038 \pm 0.054$  | $611 \pm 27$      | $0.0104 \pm 0.0183$ |
| $Al_2O_3/WO_3$ | $410 \pm 148$  | $0.108 \pm 0.150$  | $589 \pm 88$      | $0.0024 \pm 0.0066$ |
